# Supplementary material for: Quantitative Analysis of the Acceptance and Learning Success Instead of Flipped Classroom Teaching in a Caries Diagnosis Course for Undergraduate Students
Source: Hindawi journal article supplement (doi:10.1155/2022/7749638), 2022-01-01
Supplement: f1 [file 7749638.f1.pdf]

# “Flipped Classroom” Caries Diagnosis

## Satisfaction Questionnaire

- Sex:**  female  male  diverse  
**Age:**  ≤ 20  21-25  26-30  
 31-35  > 35  no answer

### Communication (from digital evaluation GMA)

- **The teaching time was put to good use**  
strongly agree      strongly disagree  no answer
- **The teaching was clearly structured**  
strongly agree      strongly disagree  no answer
- **I was clear about the learning objectives of the course**  
strongly agree      strongly disagree  no answer
- **I was able to use the teaching platform Moodle**  
strongly agree      strongly disagree  no answer
- **The teaching materials were made available in good time before the face-to-face lecture**  
strongly agree      strongly disagree  no answer
- **The length of the presentation was sufficient**  
strongly agree      strongly disagree  no answer
- **The teaching time was enough to study the online lecture**  
strongly agree      strongly disagree  no answer

### Technology (from digital evaluation GMA)

- **There were often technical problems during the course**  
strongly agree      strongly disagree  no answer
- **My skills in using the digital tools were sufficient**  
Strongly agree      strongly disagree  no answer
- **It was easy for me to structure and organize myself independently**  
strongly agree      strongly disagree  no answer

### Support (from digital evaluation GMA)

- **I felt well looked after during the online activity**  
strongly agree      strongly disagree  no answer
- **The teaching encouraged me to be an active learner**  
strongly agree      strongly disagree  no answer
- **The teacher was good at providing feedback to students**  
strongly agree      strongly disagree  no answer
- **The teacher was knowledgeable**  
strongly agree      strongly disagree  no answer
- **The teacher was well prepared for the topic in the course in a clear and understandable way**  
strongly agree      strongly disagree  no answer
- **I found the difficulty of the self-study task appropriate**  
strongly agree      strongly disagree  no answer

**Teaching (from BLOOM)**

- **I was encouraged to take an active part in the course**  
strongly agree                     strongly disagree     no answer
- **The teaching encouraged active learning for me** strongly agree              
     strongly disagree     no answer

**Atmosphere (from BLOOM)**

- **The atmosphere was relaxed during the lecture**  
strongly agree                     strongly disagree     no answer
- **I felt able to ask the questions I wanted to ask**  
strongly agree                     strongly disagree     no answer
- **I felt comfortable in class socially**  
strongly agree                     strongly disagree     no answer
- **The enjoyment outweighed the stress of the course**  
strongly agree                     strongly disagree     no answer
- **The atmosphere motivated me as a learner**  
strongly agree                     strongly disagree     no answer
- **I was able to concentrate well**  
strongly agree                     strongly disagree     no answer
- **The atmosphere during the practical session was pleasant**  
strongly agree                     strongly disagree     no answer

**Overall Rating (from digital evaluation GMA)**

- **I rate the “flipped classroom” teaching format with the following overall grade**  
1  2  3  4  5      no answer
- **The “flipped classroom” teaching format contributed to my learning success**  
strongly agree                     strongly disagree     no answer
- **I have the following points of praise, criticism and improvement:**

---

---

---

---

---

**Thank you very much for participating in my project and for taking the time to fill out the questionnaire!**
